# Supplementary material for: Migraine and tension-type headache among undergraduate medical, dental and pharmaceutical students of University of Aleppo: a cross-sectional study
Source: HighWire-hosted journal article supplement (doi:10.1136/bmjno-2021-000211), 2021-10-01
Supplement: bmjno-2021-000211supp001_data_supplement.pdf [file bmjno-2021-000211supp001_data_supplement.pdf]

## **Migraine and tension type headache among undergraduate medical, dental and pharmaceutical students of University of Aleppo: a cross sectional study**

### **Section 1**

- 1- Age:
- 2- Sex:
  - a) Female
  - b) Male
- 3- Academic year:
  - a) Second
  - b) Third
  - c) Fourth
  - d) Fifth
  - e) Sixth
- 4- Academic degree:
  - a) 60-69
  - b) 70-79
  - c) 80-89
  - d) 90-100
- 5- Marital Status:
  - a) Single
  - b) Engaged
  - c) Married
  - d) Widow
- 6- Job:
  - a) No
  - b) Yes
- 7- Residence:
  - a) Countryside
  - b) City
- 8- Living with family:
  - a) No
  - b) Yes
- 9- Smoking:
  - a) No
  - b) Yes

10- Hookah:

- a) No
- b) Yes

11- Alcohol:

- a) No
- b) Yes

12- Have you ever had a headache at two occasions or more in the last three months?

- a) Yes
- b) No

**(If the answer to this question is yes, complete the questionnaire and if the answer is no stop)**

## Section 2

### Type 1 headache assessment questions

- 1- Does the headache attacks last between 4-72 hour? (yes / no).
- 2- What is the approximate number of Headache attacks per month? (less than one attack per month/1-14 / 15 or more/ daily)
- 3- Is the headache unilateral? (yes/no).
- 4- Is the headache pulsatile? (yes/No)
- 5- Headache severity (mild/moderate/severe)
- 6- Does the headache get worse by the routine chores such as climbing stairs or walking? (yes / no)
- 7- Is the headache attacks accompanied by nausea or vomiting? (yes / no)
- 8- Is the headache attacks accompanied by Photophobia? (yes / no)
- 9- Is the headache attacks accompanied by phonophobia? (yes / no)

### Type 2 headache assessment questions

- 1- Is the headache preceded by periods of vocal disturbance such as hearing strange voices? (yes/no)
- 2- Is the headache preceded by a period in which it occurs sensory discomfort such as numbness and tingling on one side of your body? (yes/no)
- 3- Is the headache preceded by a period including see sparks Photocell vision or absence of seeing part of the total visual field? (yes / no)
- 4- Does any of the aura symptoms spread gradually within 5 minutes? (yes / no)
- 5- Do you have two or more symptoms occur in succession? (yes / no)

- 6- Does the aura last from 5 minutes to 60 minutes? (yes / no)
- 7- Is one of the aura symptoms unilateral? (yes / no)
- 8- Is one of the aura symptoms positive? (yes / no)
- 9- Is the aura accompanied or followed within 60 minutes by a headache? (yes / no)

### **Type 3 headache assessment questions**

- 1- Does the headache attacks last between 30 minutes and 7 days? (yes/no)
- 2- Approximately what is the number of headache attacks per month? (less than one attack per month/1-14 attacks/15 or more/daily)
- 3- Is the headache bilateral? (yes/no)
- 4- Is the headache characterized as a tightening non pulsating? (yes/no)
- 5- Headache severity (mild/moderate/severe)
- 6- Is the headache intensified by doing routine chores such as climbing stairs or walking? (yes/no)
- 7- Is the headache accompanied by nausea or vomiting? (yes/no)
- 8- Is the headache accompanied by photophobia? (yes/no)
- 9- Is the headache accompanied by phonophobia? (yes/no)

### **Section 3**

#### **A group of questions about headache triggers:**

- 1- Does a headache limit your ability to study or enjoying life? (yes/no)
- 2- Is there any of your relatives (first degree relatives) suffers from tension type headaches or migraine? (yes/ no)
- 3- The age at which your headache began .....
- 4- How would you describe the type of headache? (throbbing /tightening/sharp/heaviness feeling)
- 5- Headache location (Generalized/Vertex/Unilateral/Temporal/Occipital/Other)
- 6- Duration of headache (less than 4 hours / 4-8 /8-24 / more than 24 hours)
- 7- Is the headache associated with pain in the neck? (yes /no)
- 8- Are there factors that trigger headaches attacks? (yes/no)

**If the answer is yes, answer the following question**

9- Identify the factors that trigger your headaches (more than one option can be selected)

|                    |                    |                     |                                  |
|--------------------|--------------------|---------------------|----------------------------------|
| Strong odors       | Fasting            | Noise               | Sleeping too much                |
| Watching TV        | Menstruation       | Mobile use          | Expose to the sun                |
| Bath               | Emotional distress | Lack of sleep       | Exam                             |
| Smoking            | Reading            | Eat a specific meal | Deprivation from coffee drinking |
| Using the computer | Stress             | Weather changes     |                                  |

## Section 4

### A group of questions about treatment:

- 1- Have you had a medical consultation for Headache? (yes/no)
- 2- Do you use analgesics? (yes/no)

**If the answer is yes, answer the following questions and if the answer is no stop.**

- 3- Did you take analgesics due to? (Doctor advice / Pharmacist advice / Your family advice / Self- decision / other)
- 4- The number of times of taking analgesics per month (1-7 days/ 8-14 days/28-15 days/daily)
- 5- Did you have to increase the dose of the medication over time? (yes/no)
- 6- The type of medication you are taking (can be chosen more than one option)

(Paracetamol / Ibuprofen / Aspirin /Codeine / Diclofenac/ Triptan / other)

- 7- Do you use preventive medication for headaches? (yes/no)
- 8- If the answer is yes, please choose the medication (beta blockers/calcium blockers/ antidepressant/other)

## Section 5

### Do you think that the cause of your headache is one of the following psychological factors? (You can choose more than one answer)

|                                              |                                           |                           |                            |
|----------------------------------------------|-------------------------------------------|---------------------------|----------------------------|
| Dissatisfaction with educational performance | Dissatisfaction with personal achievement | Dissatisfaction with life | Tendency towards conflicts |
| Insomnia                                     | Depressed mood                            | Poor financial condition  | Irritability               |
| Overwork                                     | Not to be married                         | Stress                    | Anxiety                    |
